# Supplementary material
Source: publisher figshare collection journal article supplement (https://tandf.figshare.com/ndownloader/files/20281614)
Supplement: Supplementary file 1 [file 20281614]

**Supplemental Table1** HBV DNA level and treatments (therapeutic agents) in patients with HBV related compensated cirrhosis (EDTA-K2 was used as the anticoagulant)

| Patients  number | HBV DNA  (IU/mL) | Antiviral therapy | Vasoactive drugs | Antibiotic prophylaxis | Proton-pump inhibitors | Nutrition | Protecting the Liver from Harm | Hemostasis and resuscitation | Diuretics | Other  therapies |
| --- | --- | --- | --- | --- | --- | --- | --- | --- | --- | --- |
| 1 | ˂1.00E+002 | Entecavir (ETV) | Octreotide | Ceftriaxone | Omeprazole | Human albumin infusion | Polyene phosphatidylcholine,  Reduced Glutathione, | - | Furosemide,  Hydrochlorothiazide | Transmetil |
| 2 | ˂1.00E+002 | Entecavir (ETV) | Octreotide | Cefodizime | Omeprazole | - | Polyene phosphatidylcholine, Alanyl glutamine | - | - | Arginine |
| 3 | ˂1.00E+002 | Entecavir (ETV) | Octreotide | Penicillin | Pantoprazole | - | Reduced Glutathione, Polyene phosphatidylcholine | - | - | Lactulose |
| 4 | ˂1.00E+002 | Entecavir (ETV) | Octreotide | Ceftriaxone | Pantoprazole | - | Reduced Glutathione, Glycyrrhizin | - | - | - |
| 5 | 1.00E+002 | Entecavir (ETV) | Octreotide | Penicillin | Lansoprazole | - | Polyene phosphatidylcholine, Alanyl glutamine | - | - | Branched chain amino acids |
| 6 | 1.00E+002 | Entecavir (ETV) | Octreotide | Penicillin | Lansoprazole | - | Polyene phosphatidylcholine, Magnesium isoglycyrrhizinate | - | - | Branched chain amino acids |
| 7 | ˂1.00E+002 | Entecavir (ETV) | Octreotide | Ceftriaxone | Omeprazole | - | Polyene phosphatidylcholine, Magnesium isoglycyrrhizinate | - | - | - |
| 8 | ˂1.00E+002 | Entecavir (ETV) | Octreotide | Cefotaxime | Lansoprazole | - | Polyene phosphatidylcholine, Reduced Glutathione | Vitamin K |  | Branched chain amino acids |
| 9 | 1.00E+002 | Entecavir (ETV) | Octreotide | Cefodizime | Pantoprazole | - | Magnesium isoglycyrrhizinate | - | Furosemide,  Hydrochlorothiazide | Alprostadil |
| 10 | 1.00E+002 | Entecavir (ETV) | Octreotide | Penicillin | Pantoprazole | - | Magnesium isoglycyrrhizinate, Alanyl glutamine | - | - | - |
| 11 | ˂1.00E+002 | Entecavir (ETV) | Octreotide | Cefodizime | Lansoprazole | - | Reduced Glutathione, Alanyl glutamine | - | - | - |
| 12 | 1.00E+002 | Entecavir (ETV) | Octreotide | Ceftriaxone | Omeprazole | - | Polyene phosphatidylcholine, Glycyrrhizin | - | - | Branched chain amino acids |

**Supplemental Table2** HBV DNA level and treatments (therapeutic agents) in patients with HBV related compensated cirrhosis (Citrate was used as the anticoagulant)

| Patients  number | HBV DNA  (IU/mL) | Antiviral therapy | Vasoactive drugs | Antibiotic prophylaxis | Proton-pump inhibitors | Nutrition | Protecting the Liver from Harm | Hemostasis and resuscitation | Diuretics | Other  therapies |
| --- | --- | --- | --- | --- | --- | --- | --- | --- | --- | --- |
| 1 | 1.00E+002 | Entecavir (ETV) | Octreotide | Cefotaxime | Pantoprazole | - | Alanyl glutamine, Polyene phosphatidylcholine | Tranexamic Acid | - | Lactulose |
| 2 | 1.00E+002 | Entecavir (ETV) | Octreotide | Cefodizime | Pantoprazole | - | Glycyrrhizin,  Polyene phosphatidylcholine | Vitamin K | - | - |
| 3 | ˂1.00E+002 | Tenofovir (TDV) | Octreotide | Ceftriaxone | Omeprazole | - | Reduced Glutathione, Polyene phosphatidylcholine | - | - | - |
| 4 | 1.00E+002 | Entecavir (ETV) | Octreotide | Cefuroxime | Lansoprazole | - | Polyene phosphatidylcholine, Magnesium isoglycyrrhizinate | - | - | Alprostadil, Transmetil |
| 5 | ˂1.00E+002 | Entecavir (ETV) | Octreotide | Penicillin | Omeprazole | - | Polyene phosphatidylcholine, Alanyl glutamine | - | - | - |
| 6 | ˂1.00E+002 | Entecavir (ETV) | Octreotide | Cefradine | Omeprazole | - | Reduced Glutathione, Glycyrrhizin, | - | - | - |
| 7 | 1.00E+002 | Entecavir (ETV) | Octreotide | Penicillin | Omeprazole | - | Polyene phosphatidylcholine, Alanyl glutamine | - | - | - |
| 8 | 1.00E+002 | Entecavir (ETV) | Octreotide | Ceftriaxone | Lansoprazole | - | Polyene phosphatidylcholine, Magnesium isoglycyrrhizinate, Alanyl glutamine | - | - | - |
| 9 | ˂1.00E+002 | Entecavir (ETV) | Octreotide | Ceftriaxone | Pantoprazole | - | Reduced Glutathione, Magnesium isoglycyrrhizinate | - | - | Propranolol |
| 10 | 1.00E+002 | Entecavir (ETV) | Octreotide | Ceftazidime | Omeprazole | - | Reduced Glutathione, Magnesium isoglycyrrhizinate,  Alanyl glutamine | - | - | - |
| 11 | 1.00E+002 | Entecavir (ETV) | Octreotide | Cefotaxime | Pantoprazole | - | Polyene phosphatidylcholine | - | - | - |
| 12 | ˂1.00E+002 | Entecavir (ETV) | Octreotide | Cefodizime | Lansoprazole | - | Reduced Glutathione,  Alanyl glutamine | - | - | Branched chain amino acids |

**Supplemental Table3** HBV DNA level and treatments (therapeutic agents) in paired patients with HBV related compensated cirrhosis before and after SPD

| Patients  number | HBV DNA  (IU/mL) | Antiviral therapy | Vasoactive drugs | Antibiotic prophylaxis | Proton-pump inhibitors | Nutrition | Protecting the Liver from Harm | Hemostasis and resuscitation | Diuretics | Other  therapies |
| --- | --- | --- | --- | --- | --- | --- | --- | --- | --- | --- |
| 1 | 1.00E+002 | Entecavir (ETV) | Octreotide | Ceftriaxone | Omeprazole | Human albumin infusion | Alanyl glutamine | Vitamin K | Furosemide | Transmetil |
| 2 | 1.00E+002 | Entecavir (ETV) | Octreotide | Cefotaxime | Pantoprazole | Human albumin infusion | Reduced Glutathione | Vitamin K | - | Alprostadil |
| 3 | ˂1.00E+002 | Entecavir (ETV) | Octreotide | Penicillin | Lansoprazole | Human albumin infusion | Reduced Glutathione | Vitamin K | - | - |
| 4 | 1.00E+002 | Entecavir (ETV) | Octreotide | Ceftriaxone | Lansoprazole | - | Reduced Glutathione,  Alanyl glutamine | - | - | Branched chain amino acids |
| 5 | ˂1.00E+002 | Entecavir (ETV) | Octreotide | Penicillin | Lansoprazole | - | Reduced Glutathione, Magnesium isoglycyrrhizinate | - | - | - |
| 6 | 1.00E+002 | Entecavir (ETV) | Octreotide | Penicillin | Pantoprazole | - | Reduced Glutathione, Alanyl glutamine | - | - | - |
| 7 | ˂1.00E+002 | Entecavir (ETV) | Octreotide | Cefodizime | Pantoprazole | - | Reduced Glutathione,  Polyene phosphatidylcholine | - | Furosemide | - |
| 9 | ˂1.00E+002 | Entecavir (ETV) | Octreotide | Penicillin | Lansoprazole | - | Reduced Glutathione, Alanyl glutamine | - | - | - |
| 10 | 1.00E+002 | Entecavir (ETV) | Octreotide | Cefodizime | Lansoprazole | Human albumin infusion | Reduced Glutathione, Magnesium isoglycyrrhizinate, Alanyl glutamine | - | - | Alprostadil, Branched chain amino acids |

**Supplemental Table4** HBV DNA level and treatments (therapeutic agents) in patients with HBV related compensated cirrhosis (addition of normal human plasma *in vitro*)

| Patients  number | HBV DNA  (IU/mL) | Antiviral therapy | Vasoactive drugs | Antibiotic prophylaxis | Proton-pump inhibitors | Nutrition | Protecting the Liver from Harm | Hemostasis and resuscitation | Diuretics | Other  therapies |
| --- | --- | --- | --- | --- | --- | --- | --- | --- | --- | --- |
| 1 | 1.00E+002 | Entecavir (ETV) | - | Moxifloxacin |  | - | Alanyl glutamine, Polyene phosphatidylcholine | - | - | Transmetil |
| 2 | 1.00E+002 | Entecavir (ETV) | - | Penicillin | Pantoprazole | - | Glycyrrhizin,  Polyene phosphatidylcholine  Reduced Glutathione | Vitamin K,  Tranexamic acid, Ethamsylate | - | - |
| 3 | ˂1.00E+002 | Entecavir (ETV) | - | Latamoxef | Pantoprazole | - | Reduced Glutathione, Polyene phosphatidylcholine,  Glycyrrhizin | Vitamin K,  Tranexamic acid, Ethamsylate | - | - |
| 4 | 1.00E+002 | Entecavir (ETV) | - | - | - | - | Polyene phosphatidylcholine, Magnesium isoglycyrrhizinate | - | Spironolactone,   Hydrochlorothiazide |  |
| 5 | 9.33E+003 | Entecavir (ETV) | Octreotide | Cefotaxime | - | Human albumin infusion | Alanyl glutamine, Polyene phosphatidylcholine | - | Spironolactone,  Furosemide, | Alprostadil |
| 6 | 1.00E+002 | Entecavir (ETV) | - | - | Pantoprazole | - | Magnesium isoglycyrrhizinate | - | - | - |
| 7 | 1.00E+002 | Entecavir (ETV) | - | - | - | - | Polyene phosphatidylcholine,  Glycyrrhizin, Alanyl glutamine | - | - | - |
